# Supplementary material
Source: PubMed Central journal article supplement (PMC6519913)
Supplement: zsz026_suppl_supplementary-material.pdf [file zsz026_suppl_supplementary-material.pdf]

Supplemental Information

**Supplemental Table 1.** PRT Accuracy as a Function of Stimulus, Block, and Sleep Condition

| Condition | Block Number | Rich Trial Accuracy | Lean Trial Accuracy | Overall Accuracy |
|-----------|--------------|---------------------|---------------------|------------------|
| US        | 1            | .72 (.15)           | .6 (.12)            | .67 (.1)         |
|           | 2            | .76 (.12)           | .58 (.13)           | .67 (.1)         |
|           | 3            | .78 (.12)           | .57 (.14)           | .66 (.14)        |
| FA        | 1            | .73 (.11)           | .61 (.13)           | .67 (.08)        |
|           | 2            | .76 (.1)            | .54 (.12)           | .65 (.08)        |
|           | 3            | .77 (.1)            | .54 (.13)           | .67 (.08)        |

**Supplemental Table 2.** PRT Quality Control Results

| Condition | Block Number | Trials Excluded for <150ms RT | Trials Excluded for >150ms RT | Trials Excluded for RT +/- 3SD |
|-----------|--------------|-------------------------------|-------------------------------|--------------------------------|
| US        | 1            | .22 (.72)                     | .24 (.53)                     | .59 (1.2)                      |
|           | 2            | .54 (1.7)                     | .88 (2.7)                     | .49 (.75)                      |
|           | 3            | 1.39 (5.91)                   | 1.22 (3.13)                   | .95 (1.05)                     |
| FA        | 1            | .39 (1.14)                    | .51 (2.05)                    | .32 (.69)                      |
|           | 2            | .51 (1.4)                     | 1.46 (3.4)                    | .78 (1.13)                     |
|           | 3            | 1.27 (3.3)                    | 1.93 (4.12)                   | .83 (1.14)                     |

**Supplemental Table 3.** Differences in sleep architecture and sustained attention between sleep conditions

|                | US             | FA             | <i>p</i> |
|----------------|----------------|----------------|----------|
| TST            | 426.98 (66.89) | 262.13 (26.83) | <.001    |
| Stage N1       | 18.67 (12.11)  | 19.81 (11.41)  | .792     |
| Stage N2       | 192.11 (54.56) | 115.86 (23.61) | <.001    |
| Stage N3 (SWS) | 114.05 (48.65) | 73.16 (26.95)  | .792     |
| Stage REM      | 102.15 (31.59) | 53.30 (21.64)  | <.001    |
| Mean RRT       | 3.49 (0.57)    | 3.60 (0.53)    | .021     |
| Lapses         | 5.89 (7.59)    | 7.21 (9.89)    | .25      |

Note. US= Uninterrupted Sleep; FA=Forced Awakenings; TST=Total sleep time; N1-3=non-rapid eye movement stages 1-3; SWS = slow wave sleep; REM = rapid eye movement; all polysomnography measures reported in minutes. RRT= reciprocal response time (seconds) on the psychomotor vigilance task; Lapses = number of attentional lapses on the psychomotor vigilance task.

**Supplemental Table 4.** Differences in Vigilance by Positive Affect Response Groups

|            | <i>US</i>                     |                                 | <i>FA</i>                     |                                 |
|------------|-------------------------------|---------------------------------|-------------------------------|---------------------------------|
|            | Reduced<br>Positive<br>Affect | Preserved<br>Positive<br>Affect | Reduced<br>Positive<br>Affect | Preserved<br>Positive<br>Affect |
| PVT RRT    | 3.43 (.61)                    | 3.60 (.46)                      | 3.31 (.62)                    | 3.44 (.33)                      |
| PVT Lapses | 6.50 (8.89)                   | 4.86 (4.72)                     | 8.44 (12.01)                  | 4.50 (2.98)                     |

**Note.** Groups were not significantly different for any comparison,  $p$ 's > .05.

**Supplemental Figure 1.** Scatterplot of Bedtimes and Waketimes at Baseline

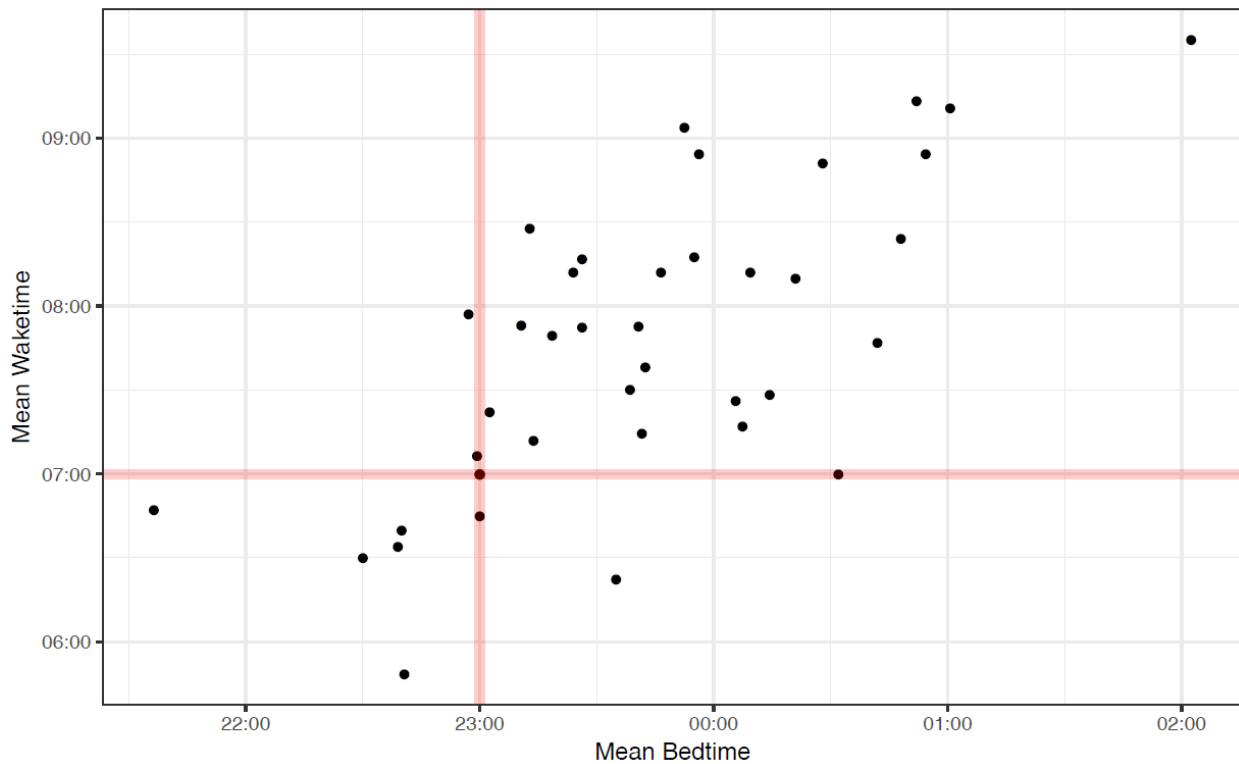

**Note.** Crosshair drawn to highlight the Bedtime (11pm) and Waketime (7am) fixed in each participant's inpatient schedule.
